# Supplementary material
Source: PubMed Central journal article supplement (PMC7826416)
Supplement: pnas.2022037118.sapp.pdf [file pnas.2022037118.sapp.pdf]

# Supplementary information for Imaging Conical Intersection Dynamics during Azobenzene Photoisomerization by Ultrafast X-Ray Diffraction

Daniel Keefer<sup>a</sup>, Flavia Aleotti<sup>b</sup>, Jérémy R. Rouxel<sup>a</sup>, Francesco Segatta<sup>b</sup>, Bing Gu<sup>a</sup>, Artur Nenov<sup>b</sup>, Marco Garavelli<sup>b</sup>, and Shaul Mukamel<sup>a,1</sup>

<sup>a</sup>*Department of Chemistry and Physics and Astronomy, University of California, Irvine, California 92697-2025, USA*

<sup>b</sup>*Dipartimento di Chimica Industriale, Università degli Studi di Bologna, Viale del Risorgimento 4, I-40136 Bologna, Italy*

\*smukamel@uci.edu

## Diffraction movies

The electronic supplement contains movies of the time-resolved diffraction signal according to the figures presented in the main manuscript. The movie captions are given in the following.

**Movie S1:** Nuclear wavepacket motion on the adiabatic potential energy surface for azobenzene isomerization according to Eq. (10). This movie corresponds to Fig. 2 of the main manuscript and gives the full time-resolved picture.

**Movie S2:** Time evolution of the full  $\mathbf{q}$ -space diffraction pattern according to Eq. (3), and dissected into the corresponding terms. This movie corresponds to Fig. 3 of the main manuscript and gives the full time-resolved picture.

**Movie S3:** Two-dimensional diffraction patterns of all three molecular planes after integration of the respective third spatial direction. Orientational axes are given in Fig. 1. This movie corresponds to Fig. 4 of the main manuscript and gives the full time-resolved picture.

**Movie S4:** Two-dimensional diffraction patterns of the coherence term  $(v)$  in Eq. (3) in all three molecular planes and after integration of the respective third spatial direction. Orientational axes are given in Fig. 1. This movie corresponds to Fig. 5 of the main manuscript and gives the full time-resolved picture.

**Movie S5:** Real-space movie of the electronic transition density  $\langle \chi_e(t) | \sigma_{ge}(\mathbf{r}) | \chi_g(t) \rangle$  during the non-adiabatic passage. This movie corresponds to Fig. 8(d)–(f) of the main manuscript and gives the full time-resolved picture.
